# Supplementary material for: Antifouling Properties of PES Membranes by Blending with ZnO Nanoparticles and NMP–Acetone Mixture as Solvent
Source: MDPI journal article supplement (doi:10.3390/membranes8040131), 2018-12-14
Supplement: s1 [file s1]

# Supplementary Materials: Antifouling Properties of PES Membranes by Blending with ZnO Nanoparticles and NMP–Acetone Mixture as Solvent

Abdul Latif Ahmad <sup>1,\*</sup>, Jayasree Sugumaran <sup>1</sup> and Noor Fazliani Shoparwe <sup>2</sup>

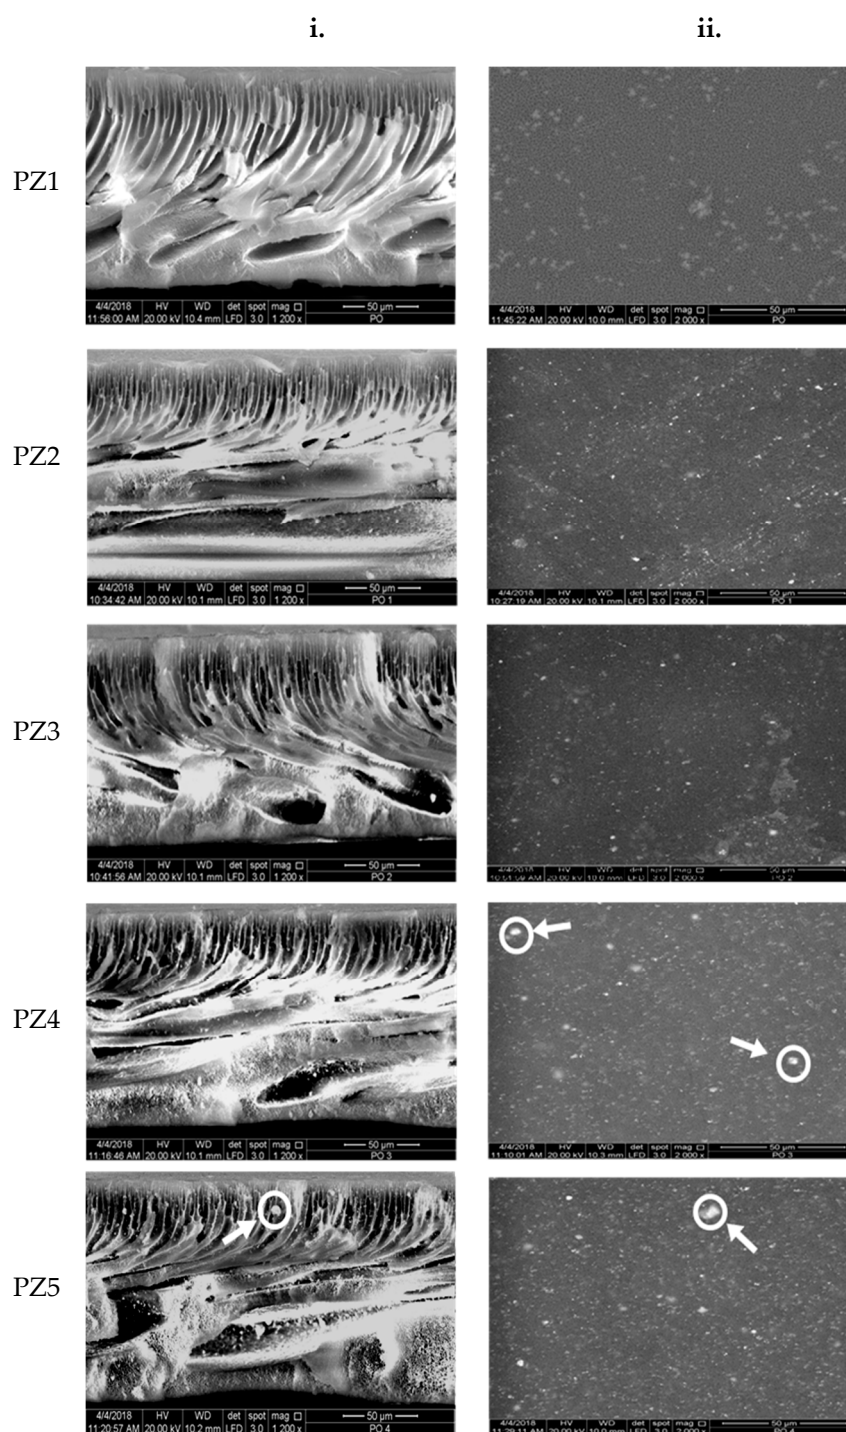

**Figure S1.** SEM micrographs of PZ1, PZ2, PZ3, PZ4 and PZ5 membrane (i) cross-section at 1200× magnification and (ii) Top surface at 2000× magnification.
